# Supplementary material
Source: PubMed Central journal article supplement (PMC11119279)

Article Title: Expression of the SLAM family of receptors adaptor EAT-2 as a novel strategy for enhancing beneficial immune responses to vaccine antigens

**Supplementary Figure 1: Ad-EAT2-mediated activation of innate and adaptive immune cells *in vivo*.** C57BL/6 mice (n=4) were either mock injected, or intravenously injected with  $7.5 \times 10^{10}$  vps of either Ad-GFP or Ad-EAT2. CD69 expression by PBMCs (a and b) and splenocyte (c and d) derived NK, NKT, CD3<sup>+</sup>CD8<sup>+</sup> T cells, CD3<sup>+</sup>CD8<sup>-</sup> T cells, and B cells was evaluated 48h after virus injection. PBMCs and Splenocytes were harvested, stained and sorted on a LSRII flow cytometer. The bars represent mean  $\pm$  SD. Statistical analysis was completed using One Way ANOVA with a student- Newman-Keuls post-hoc test, p<0. 05 was deemed a statistically significant difference. \* denotes p<0. 05, \*\* denotes p<0. 01, \*\*\* denotes p<0. 001 statistically different from mock injected animals.

**Supplementary Figure 2: IFN $\gamma$  production from NK cells 6 and 48 hours after Ads injection.** C57BL/6 mice (n=4) were either mock injected, or intravenously injected with  $7.5 \times 10^{10}$  vps of either Ad-GFP or Ad-EAT2 for 6 hpi (a) or 48 hpi (b). Splenocytes were harvested and incubated at 37°C for 5 hours in the presence of Golgi plug. IFN $\gamma$  intracellular staining was performed and cells were sorted on a LSRII flow cytometer. The bars represent mean  $\pm$  SD. Statistical analysis was completed using One Way ANOVA with a student- Newman-Keuls post-hoc test, p<0. 05 was deemed a statistically significant difference. \* denotes p<0. 05, \*\*\* denotes p<0. 001 statistically different from mock injected animals.

**Supplementary Figure 3: Analysis of T cell epitope responses of Balb/c and C57Bl/6 mice to HIV-Gag in Ad-HIV/Gag and Ad-EAT2 co-injected mice.** Balb/c (n=6) (a) or C57BL/6 (n=4) (b) mice were co-immunized with equivalent viral particles of Ad-HIV/Gag mixed with either Ad-GFP or Ad-EAT2 ( $1 \times 10^7$  total vps for Balb/c and  $1 \times 10^9$  total vps for C57Bl/6 mice). At 14 dpi splenocytes were equivalently pooled and IL-2 ELISPOT analysis was carried out by stimulating individual wells *ex vivo* with a pool of 2-4 15mer peptides overlapped by 11, not including peptides included in Figure 4 and 5. SFCs per million splenocytes are shown. The minimal threshold response is indicated by the line above 10.

**Supplementary Figure 4: Cellular immune responses after CD8<sup>+</sup> T cells depletion in Ad-HIV/Gag and Ad-EAT2 co-immunized mice.** At 14 dpi, splenocytes from vaccinated Balb/c mice ( $1 \times 10^7$  total vps) were equivalently pooled (N=6 mice per treatment) and CD8<sup>+</sup> cells were depleted using magnetic beads.  $5 \times 10^5$  splenocytes were added to each well and stimulated with the immunodominant peptide AMQMLKETI. (a) A representative flow cytometric analysis before and after CD8 T cell depletion is shown. Spots from CD8<sup>+</sup> un-depleted cells and CD8<sup>+</sup> depleted cells were quantified using an automated ELISPOT reader (b and c). %SFC that are CD8<sup>-</sup> = (#SFCs CD8 dep / #SFCs CD8<sup>+</sup>)\*100 (d). The bars represent mean  $\pm$  SD. Statistical analysis was completed using student's t-test.

# Supplementary Figure: 1

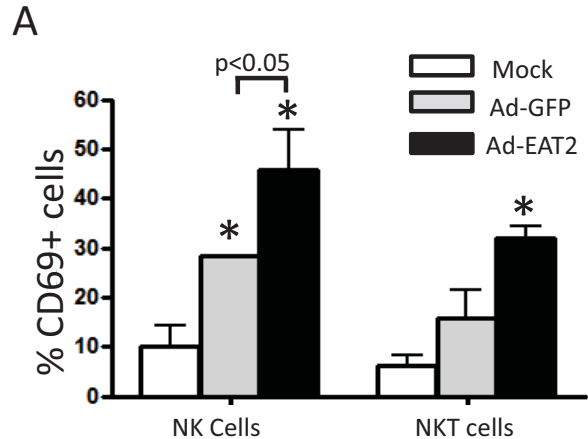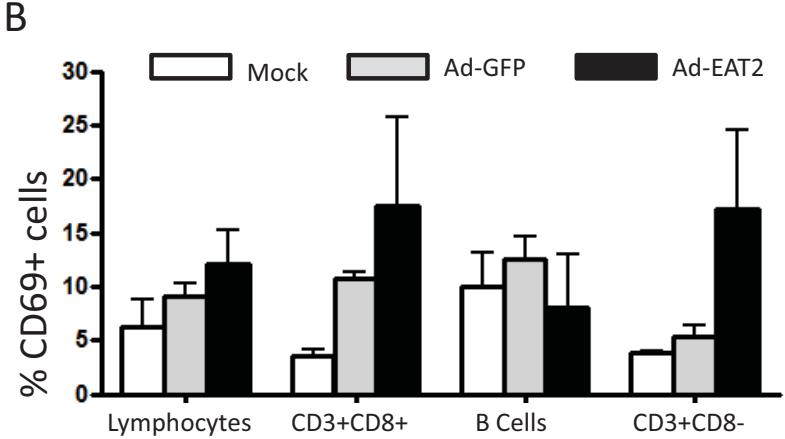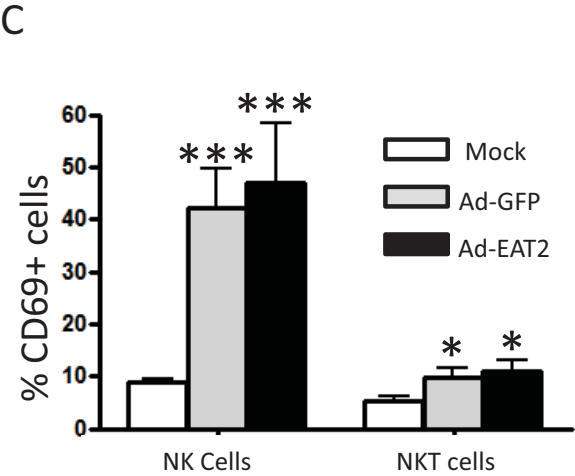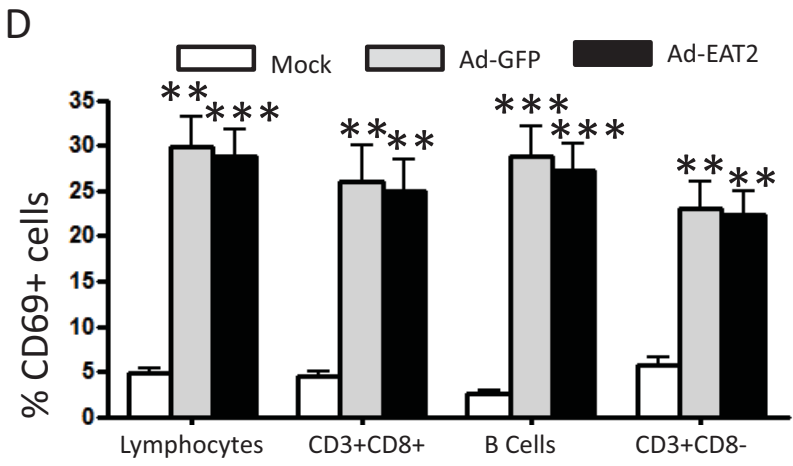

## Supplementary Figure: 2

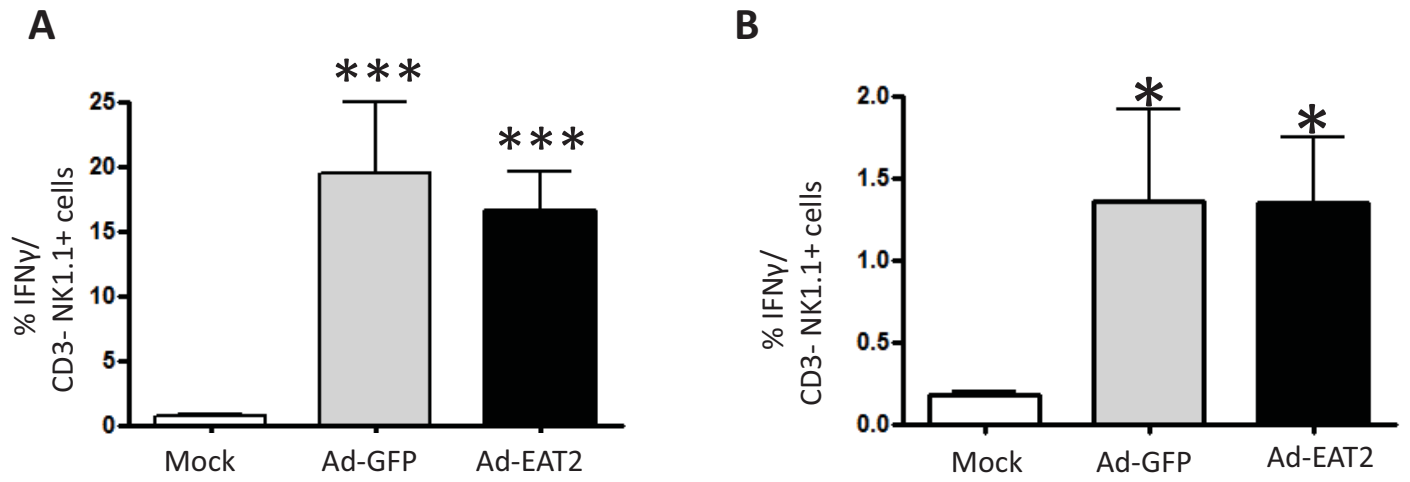

# Supplementary Figure: 3

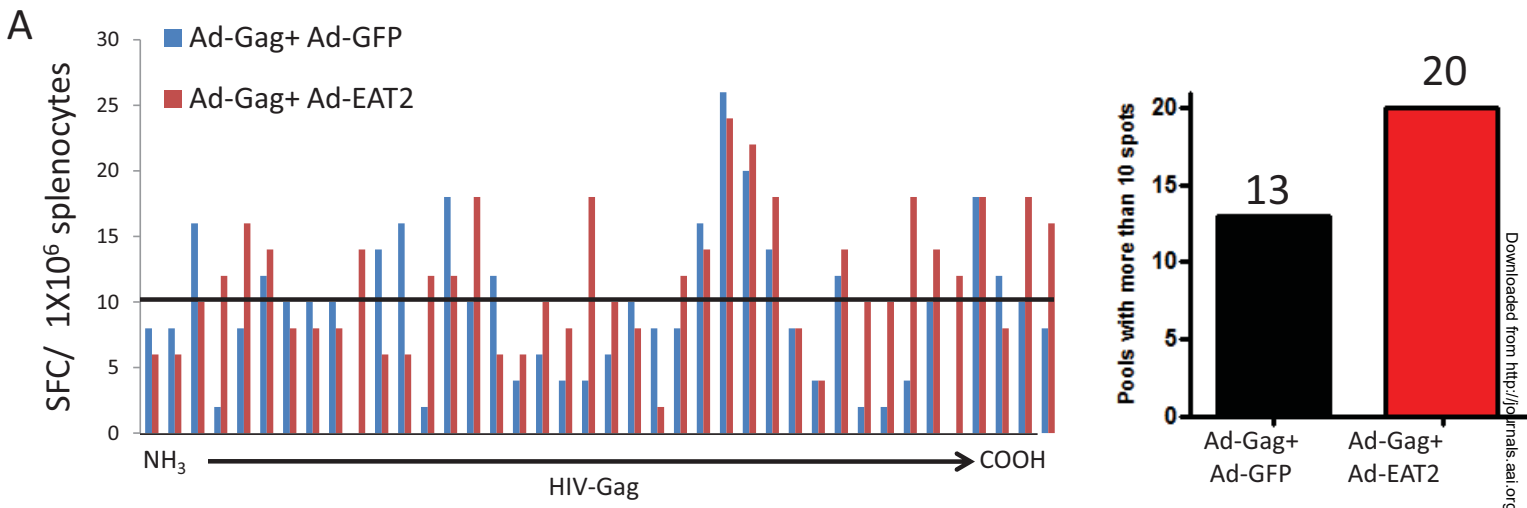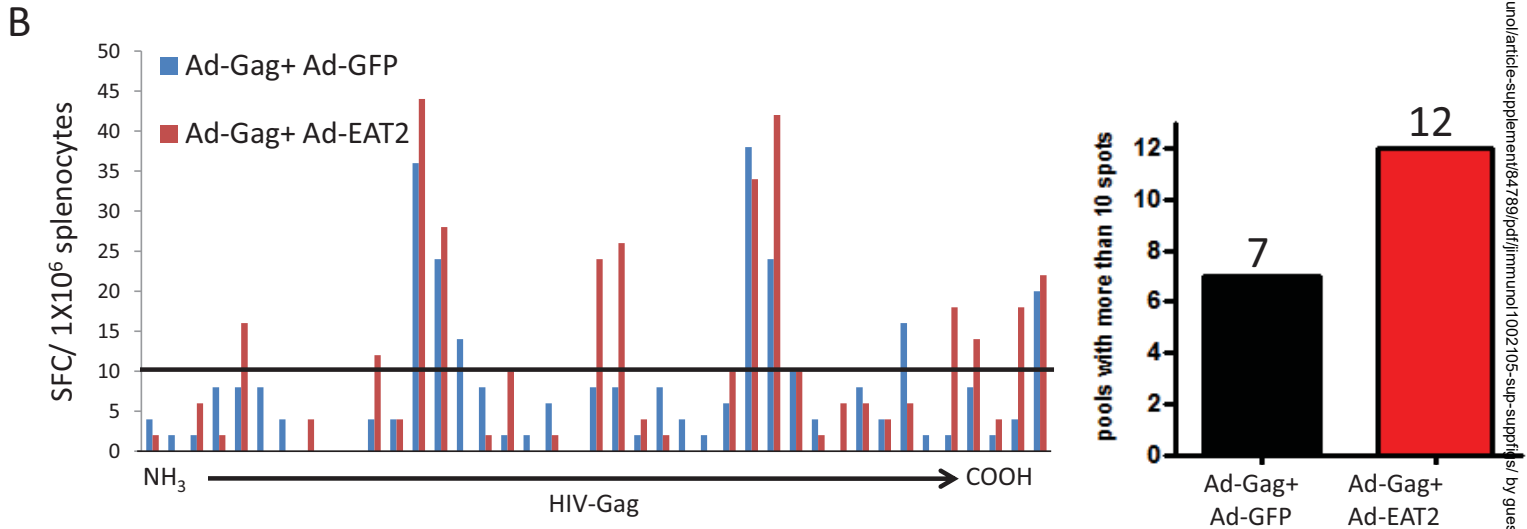

# Supplementary Figure: 4

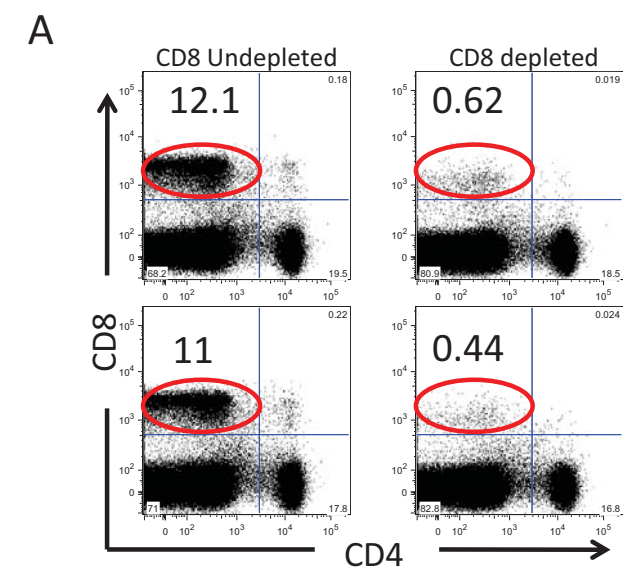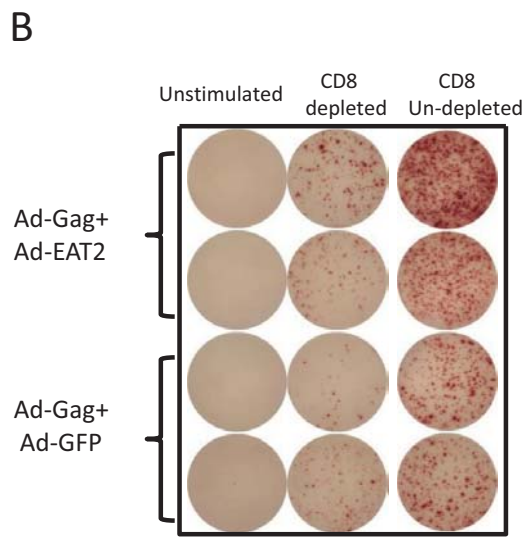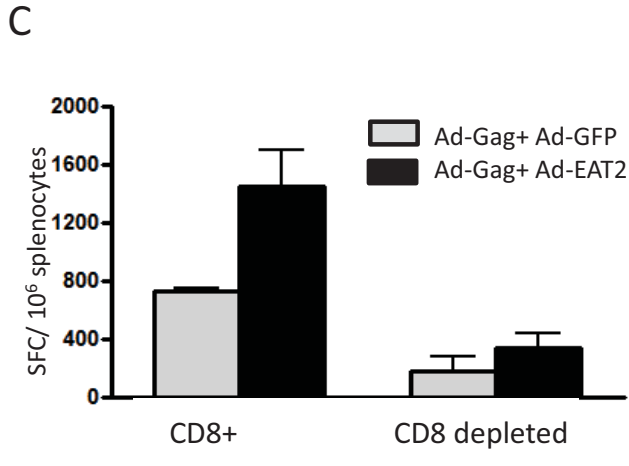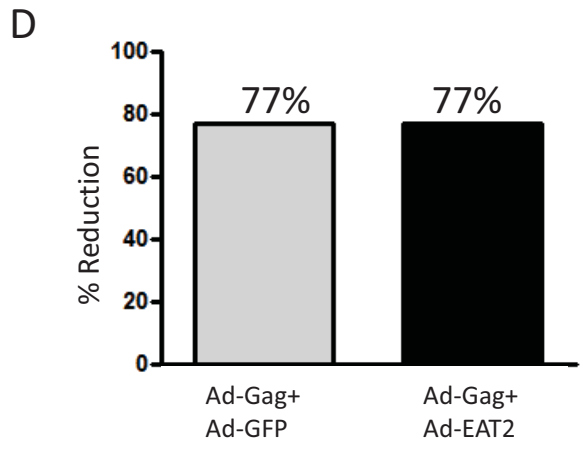

Supplement: NIHMS1991932-supplement-SupFig.pdf [file NIHMS1991932-supplement-SupFig.pdf]
